# Supplementary material for: The role of hollow magnetic nanoparticles in drug delivery
Source: Royal Society of Chemistry journal article supplement (doi:10.1039/c9ra01589b), 2019-01-01
Supplement: c9ra01589b1.pdf [file c9ra01589b1.pdf]

## **The Role of Hollow Magnetic Nanoparticles in Drug Delivery**

Ghodsi Mohammadi Ziarani\*<sup>a</sup>, Masoumeh Malmir<sup>a</sup>, Negar Lashgari<sup>a</sup>, Alireza Badiei<sup>b</sup>

<sup>a</sup> *Department of Chemistry, Alzahra University, Vanak Square, P.O. Box 1993893973, Tehran, Iran. E-mail:*

*gmziarani@hotmail.com; gmohammadi@alzahra.ac.ir*

<sup>b</sup> *School of Chemistry, College of Science, University of Tehran, 14155-6455, Tehran, Iran*

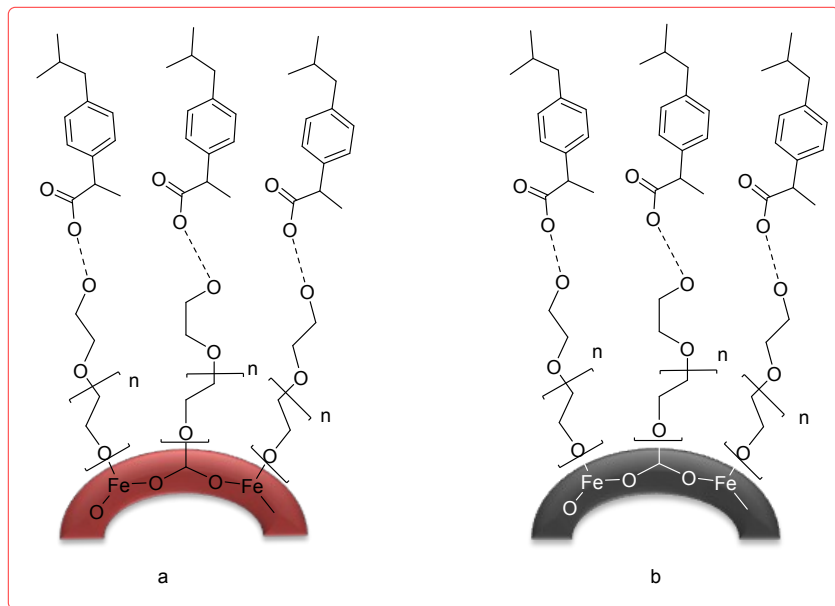

**Figure S1.** The structure of IBU-PEG-coated  $\text{Fe}_2\text{O}_3$  (a) and IBU-PEG-coated  $\text{Fe}_3\text{O}_4$  (b) <sup>1</sup>

---

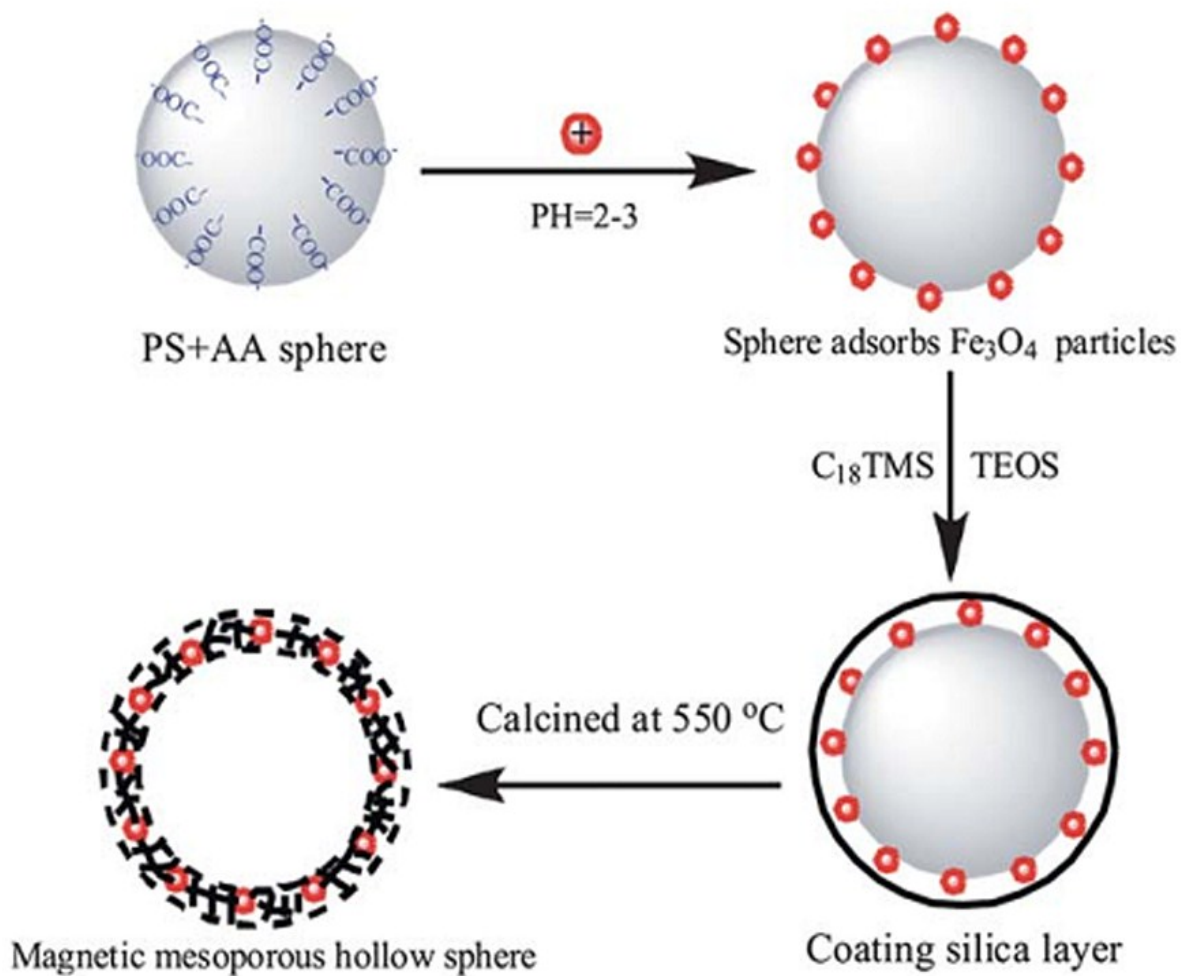

**Figure S2.** Scheme of the synthetic procedure for the preparation of hollow magnetic mesoporous spheres <sup>2</sup>

---

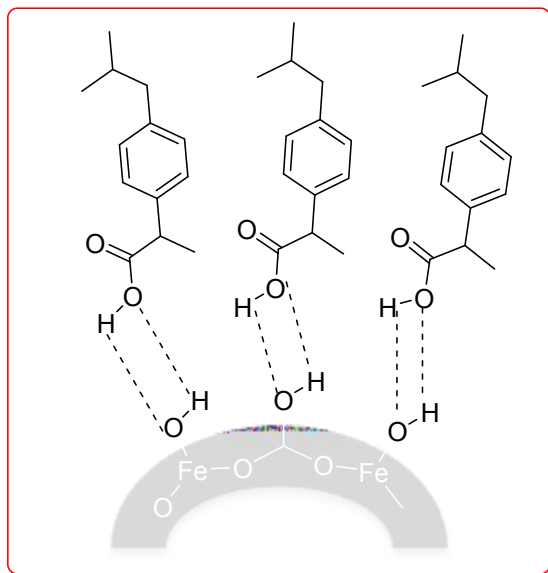

**Figure S3.** The structure of IBU-Fe<sub>3</sub>O<sub>4</sub><sup>2</sup>

---

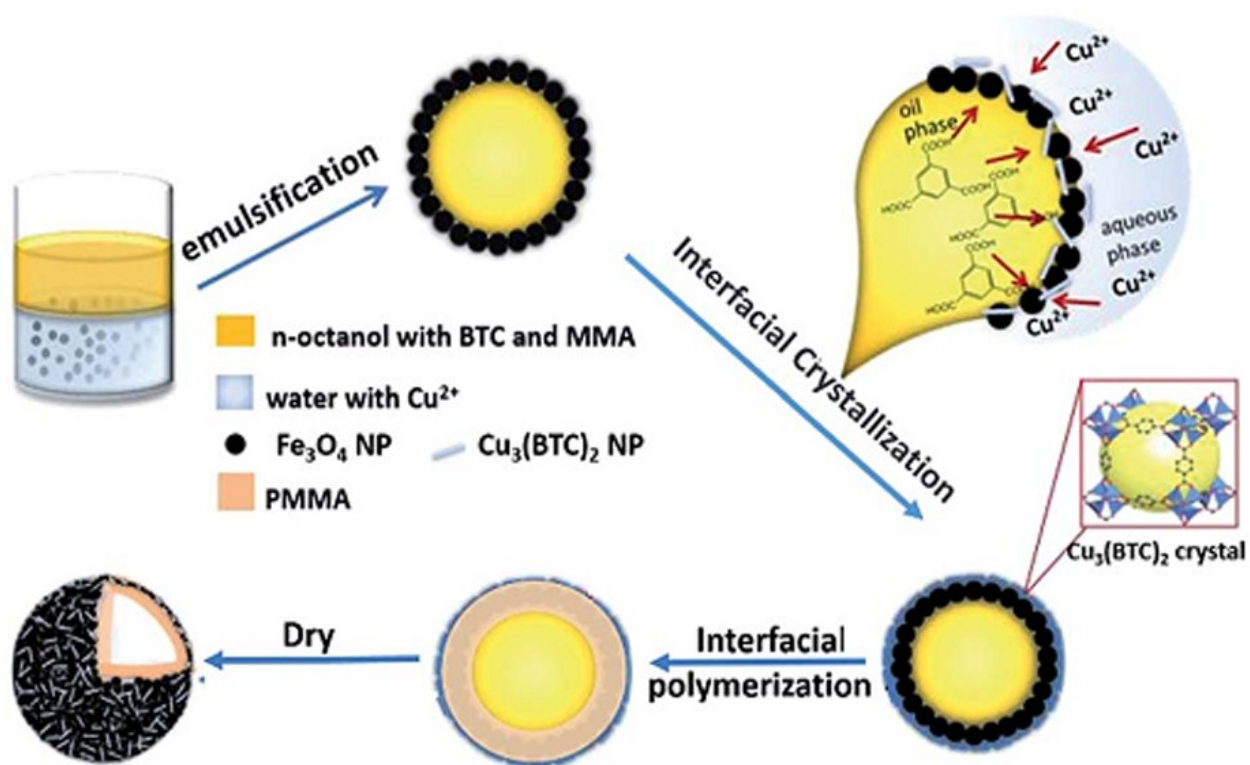

**Figure S4.** Fabrication of the hollow magnetic-MOF composite through the interfacial growth approach induced by  $\text{Fe}_3\text{O}_4$  stabilized Pickering emulsion <sup>3</sup>

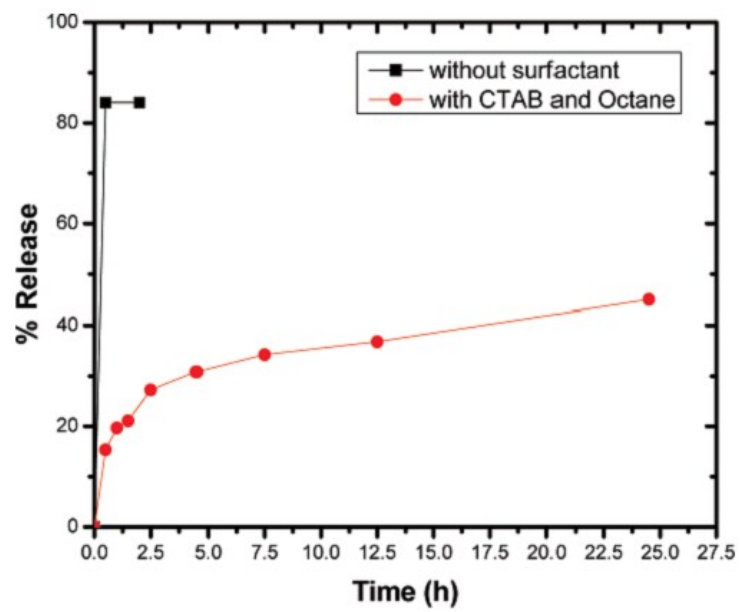

Figure S5. Drug release of ibuprofen from the porous MHSNs showing slow release <sup>4</sup>

---

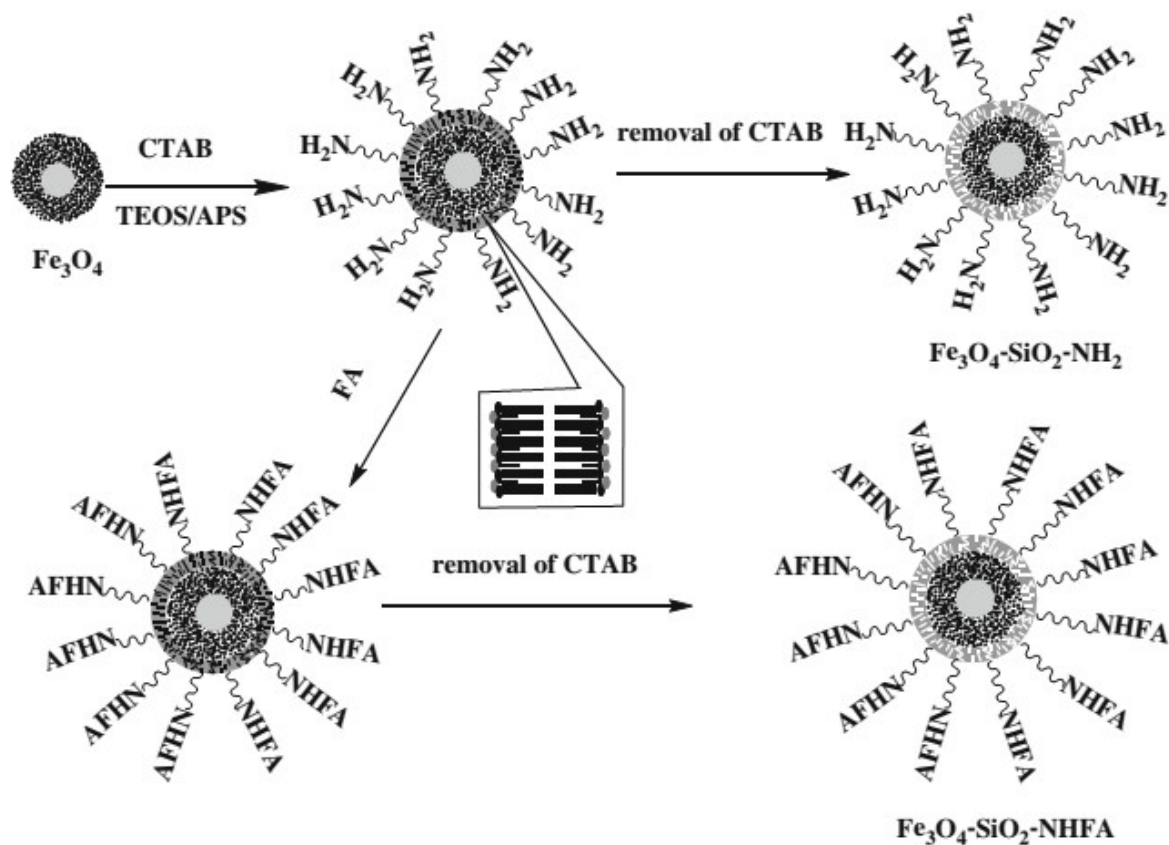

**Figure S6.** The schematic synthesis process of magnetic magnetite mesoporous silica microspheres  $\text{Fe}_3\text{O}_4\text{-SiO}_2\text{-NH}_2$  and

$\text{Fe}_3\text{O}_4\text{-SiO}_2\text{-NHFA}$  <sup>5</sup>

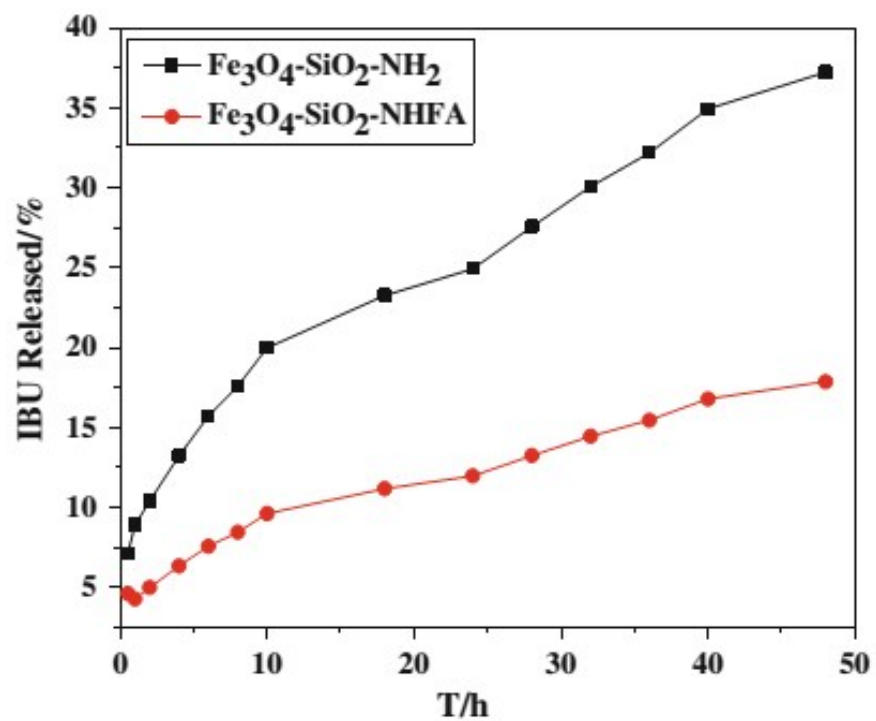

Figure S7. Ibuprofen released from Fe<sub>3</sub>O<sub>4</sub>-SiO<sub>2</sub>-NH<sub>2</sub> and Fe<sub>3</sub>O<sub>4</sub>-SiO<sub>2</sub>-NHFA microspheres curves <sup>5</sup>

---



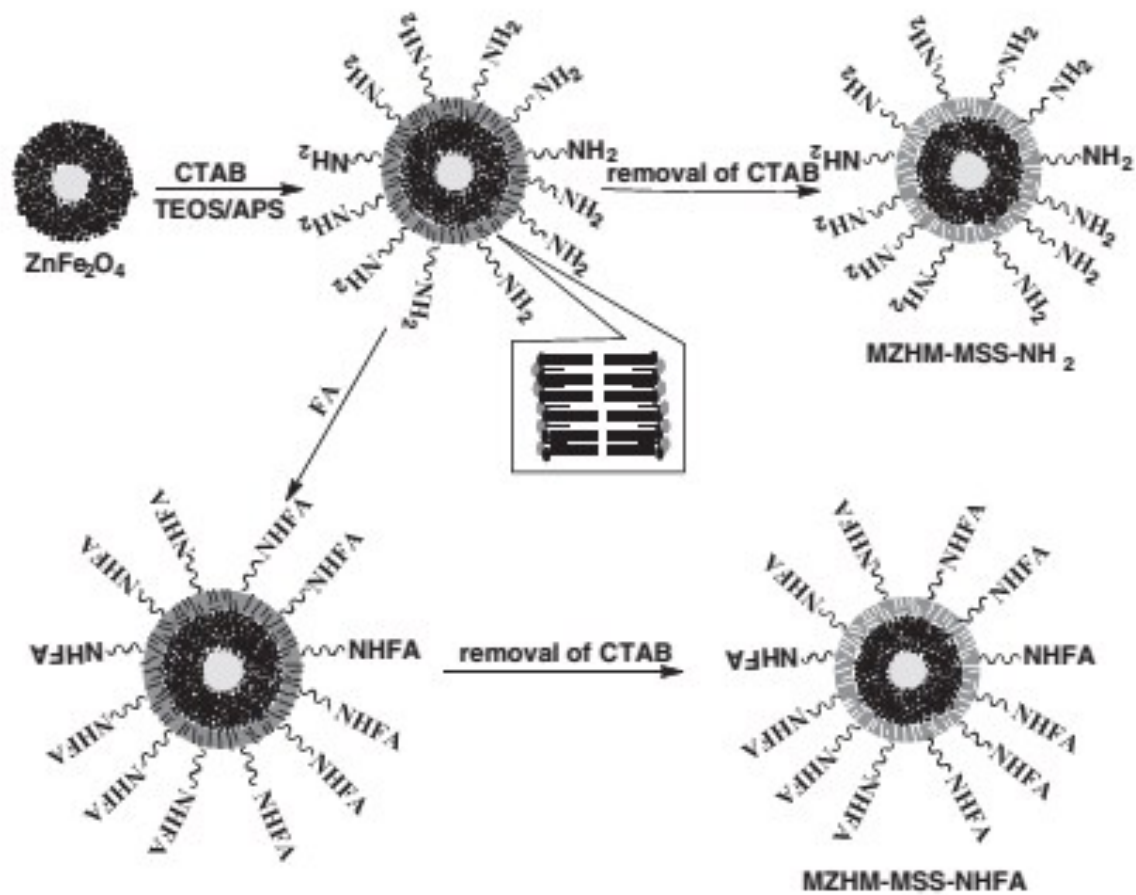

**Figure S8.** The schematic preparation process of magnetic mesoporous silica microspheres MZHM-MSS- $\text{NH}_2$  and MZHM-

MSS-NHFA <sup>6</sup>

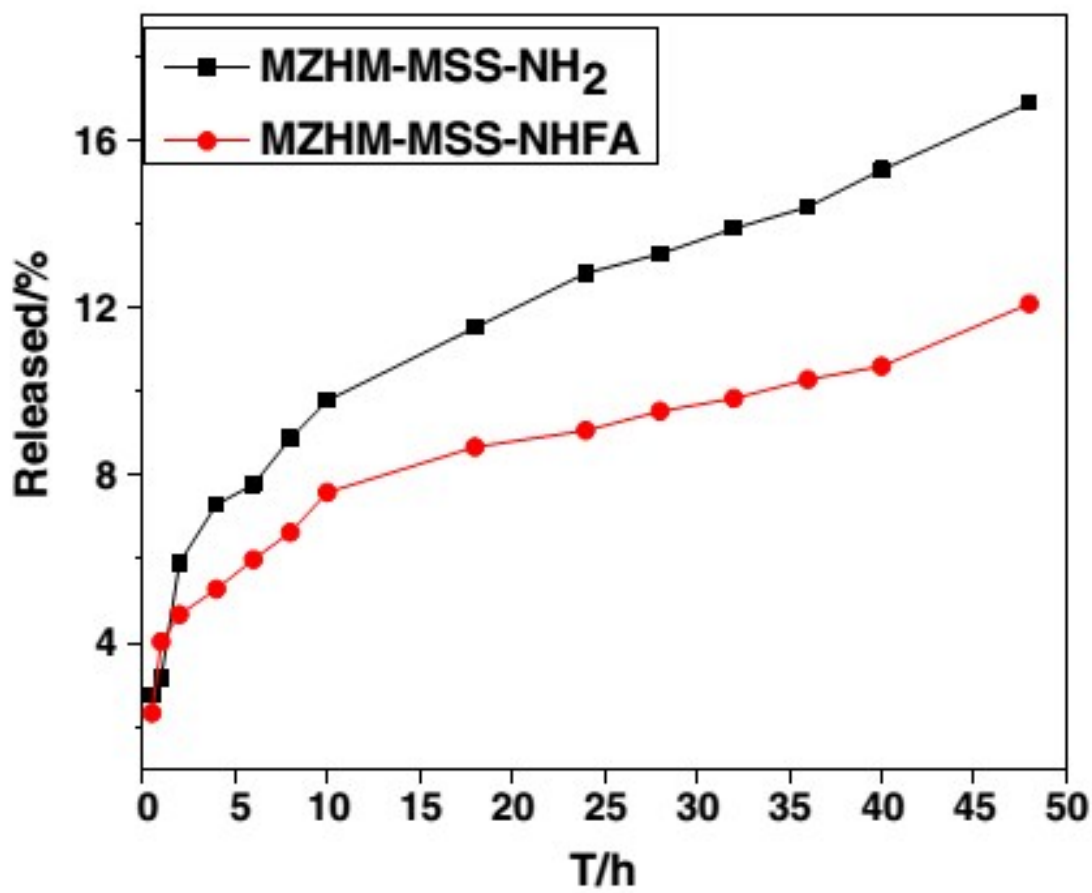

Figure S9. Cumulative ibuprofen release from MZHM-MSS-NH<sub>2</sub> and MZHM-MSS-NHFA in PBS solution at room temperature

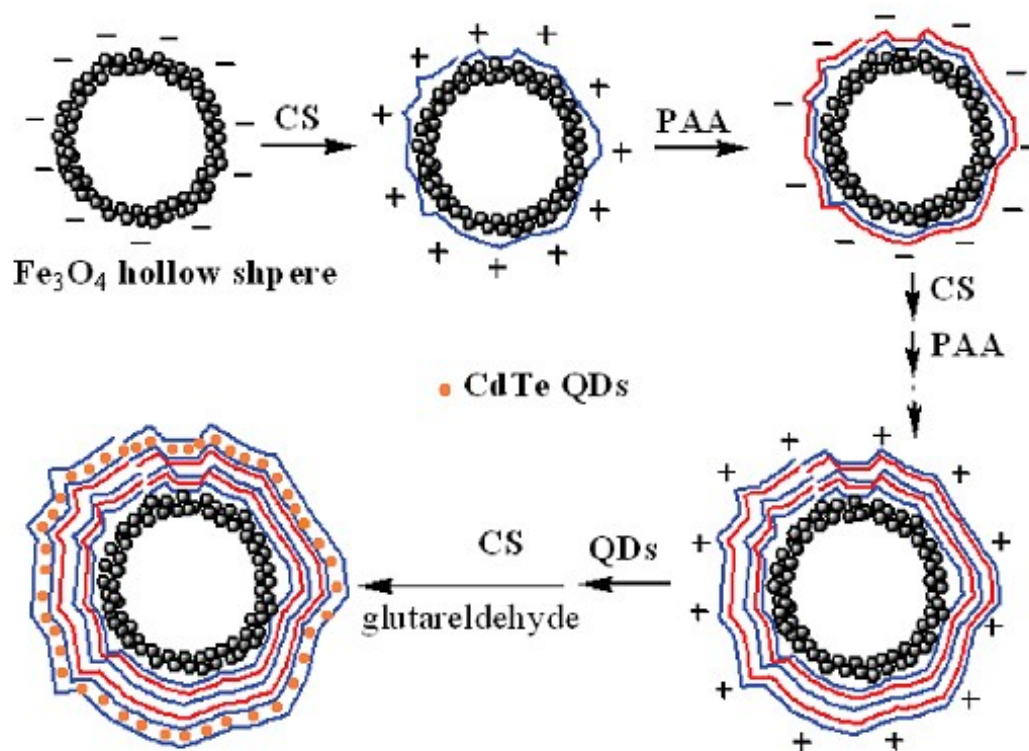

**Figure S10.** The Schematic representation of the fabrication process of the magnetic and fluorescent nanocomposites <sup>7</sup>

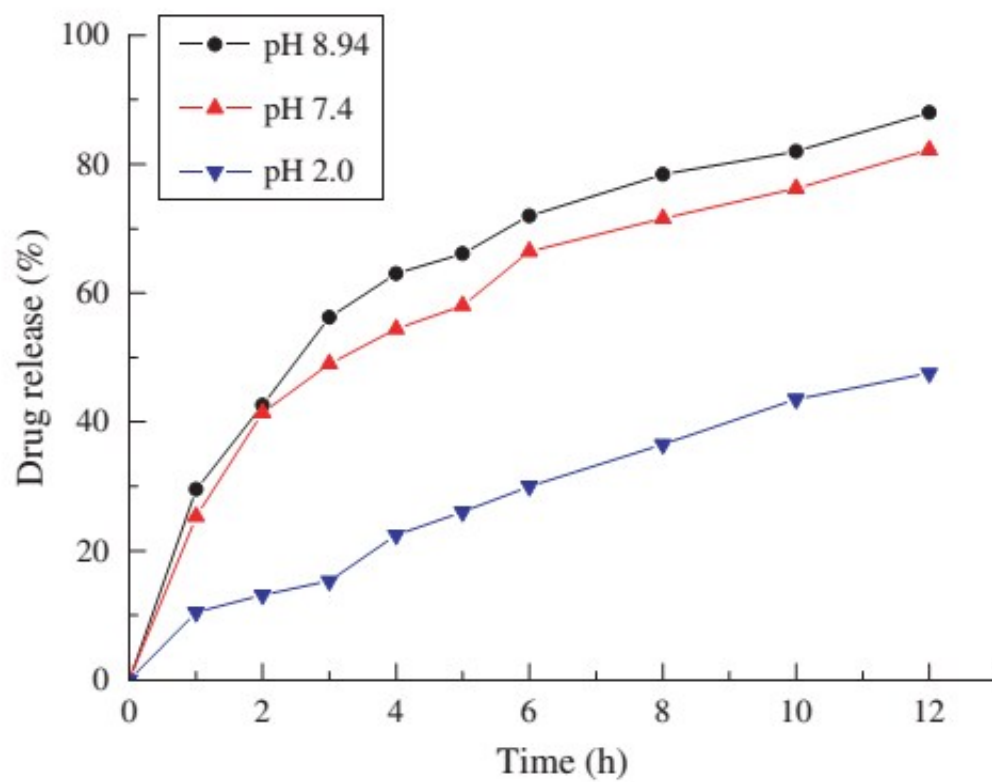

**Figure S11.** In vitro cumulative drug release of cefradine from the  $\text{Fe}_3\text{O}_4/\text{PE}_5/\text{CdTe}/\text{PE}_1$  in release media of different pH values <sup>7</sup>

---

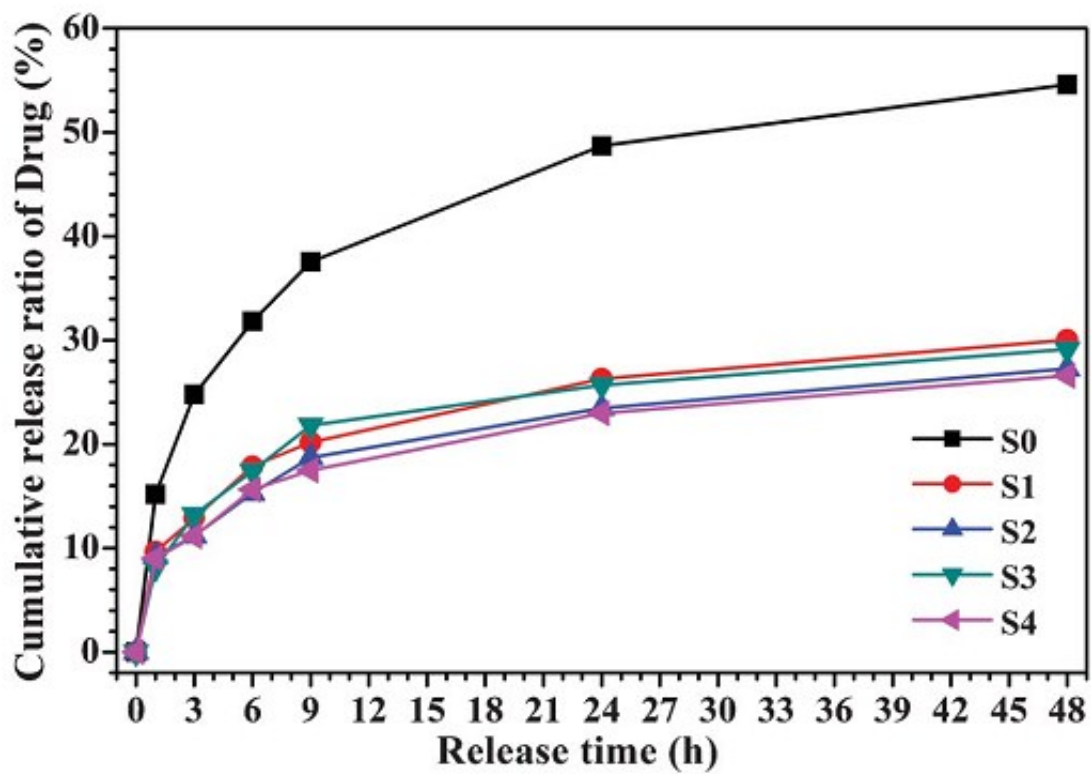

**Figure S12.** The cumulative vancomycin release ratio from the control HAp nanoparticles (S0) and HAp hollow microspheres (S1), and the fabricated magnetic HAp hollow microspheres (S2–S4) in PBS at pH = 7.40<sup>8</sup>

---

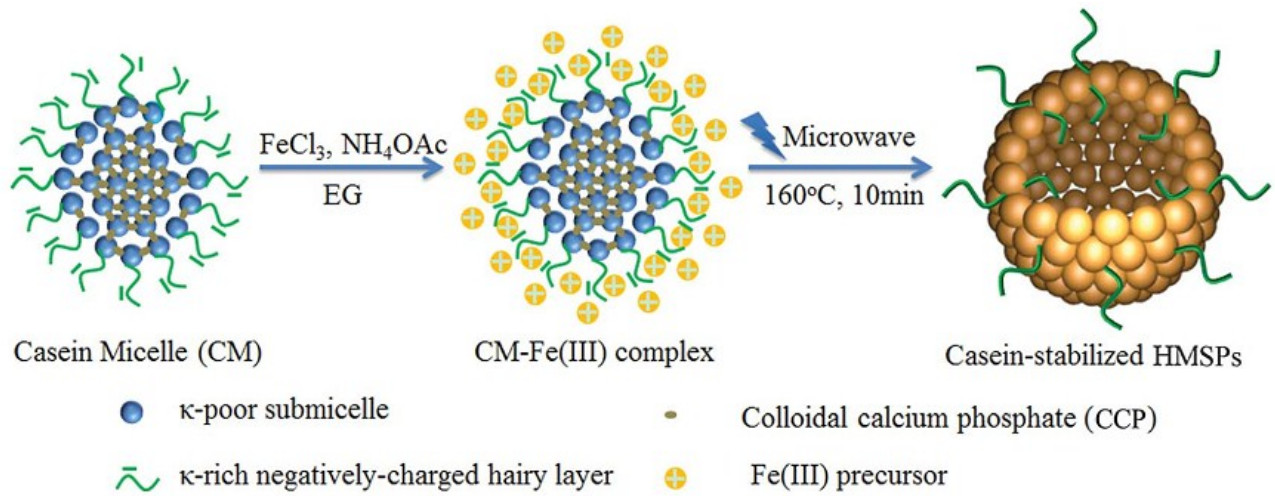

**Figure S13.** The schematic formation mechanism of the CM-mediated, microwave-assisted HMSPs <sup>9</sup>

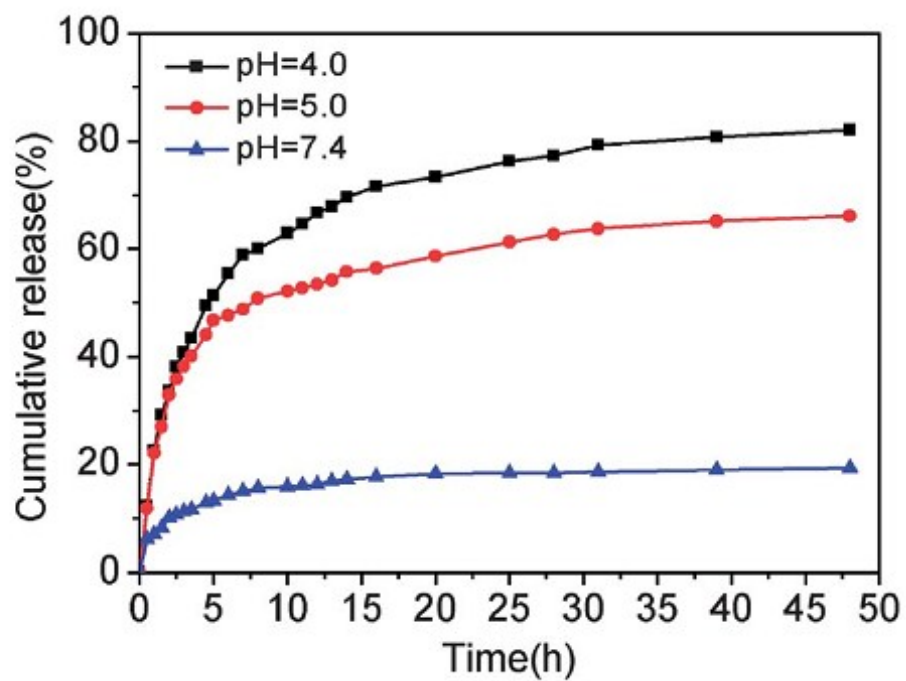

Figure S 14. Drug release profiles of DOX from HMSPs as a function of time at pH 4.0, 5.0 and 7.4 at 37 °C<sup>9</sup>

---

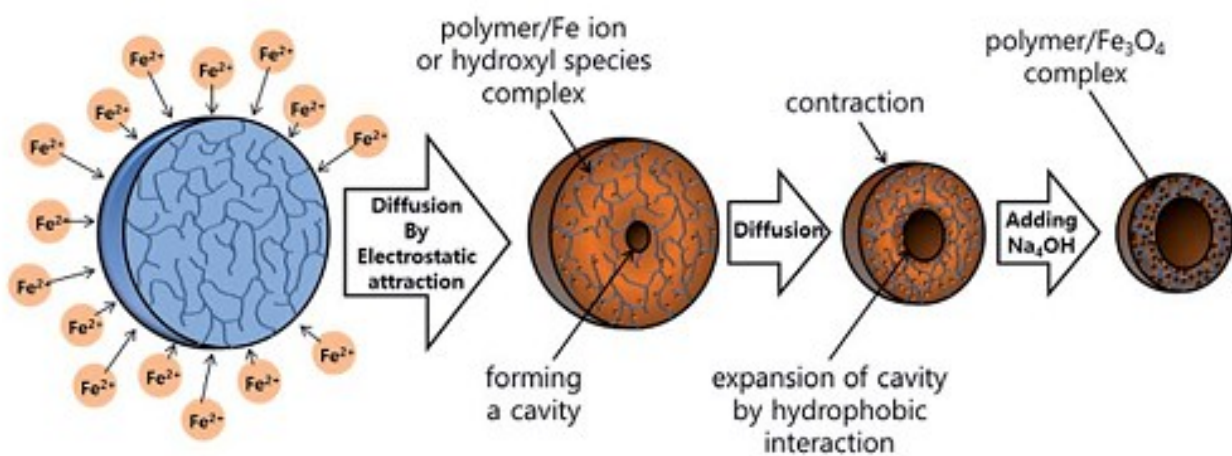

**Figure S 15.** The Schematic illustration of the mechanism of formation of the poly(MAA/EGDMA)/ $\text{Fe}_3\text{O}_4$  composite microcapsules with hollow structure <sup>10</sup>

---



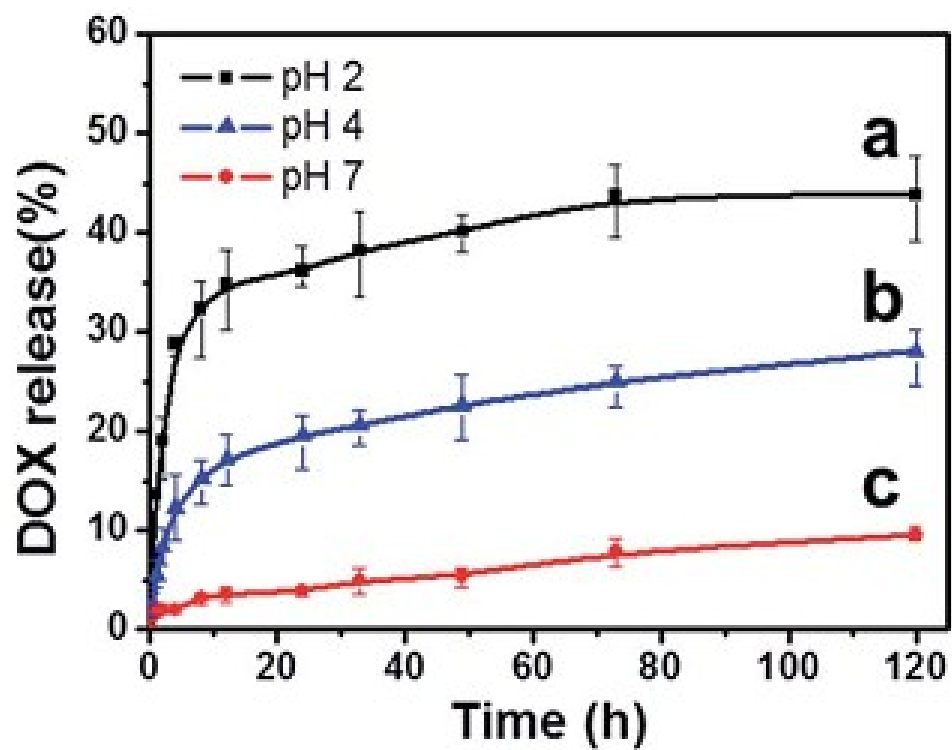

**Figure S16.** Doxorubicin cumulative release from the hollow poly(MAA/EGDMA)/Fe<sub>3</sub>O<sub>4</sub> composite microcapsules versus incubation time. Release profiles at different pH values (a) pH = 2, (b) pH = 4 and (c) pH = 7. <sup>10</sup>

---

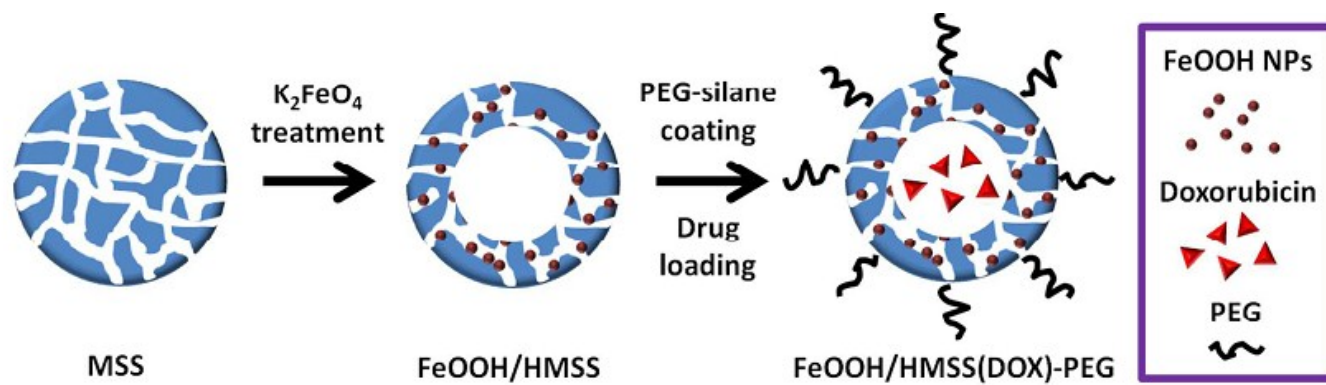

**Figure S17.** Illustration of the synthetic procedure of FeOOH/HMSS(DOX)-PEG <sup>11</sup>

---

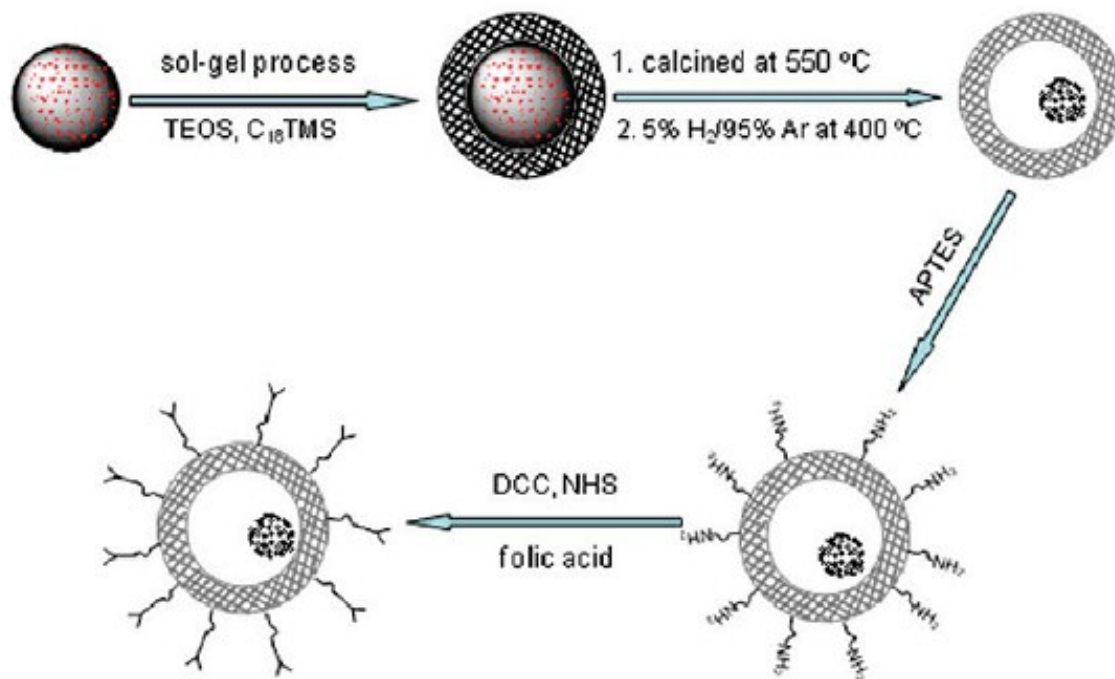

**Figure S18.** Schematic procedure for preparation and folate conjugation of Fe<sub>3</sub>O<sub>4</sub>@SiO<sub>2</sub> hollow mesoporous spheres <sup>12</sup>

---

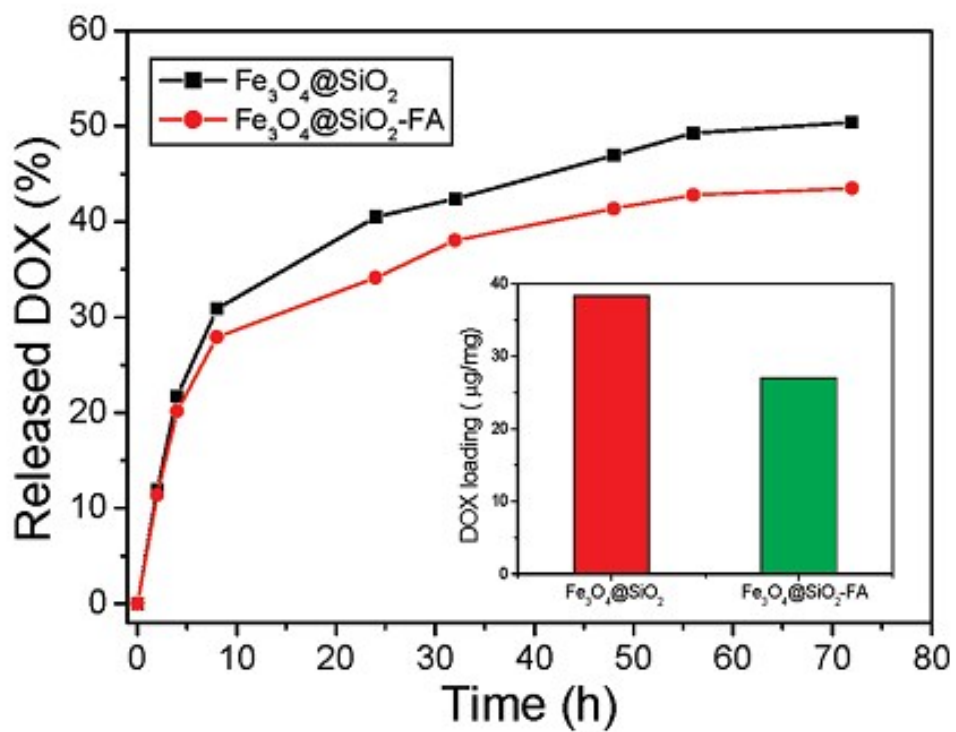

**Figure S19.** DOX release from  $\text{Fe}_3\text{O}_4@\text{SiO}_2$  and  $\text{Fe}_3\text{O}_4@\text{SiO}_2\text{-FA}$  spheres in PBS at 37 °C (inset, DOX loading capacity in  $\text{Fe}_3\text{O}_4@\text{SiO}_2$  and  $\text{Fe}_3\text{O}_4@\text{SiO}_2\text{-FA}$  spheres) <sup>12</sup>

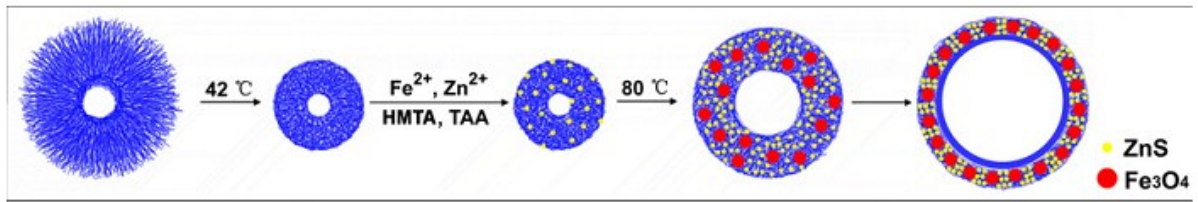

**Figure S20.** Schematic illustration for the fabrication of the PNIPAM/Fe<sub>3</sub>O<sub>4</sub>-ZnS hybrid hollow spheres <sup>13</sup>

---

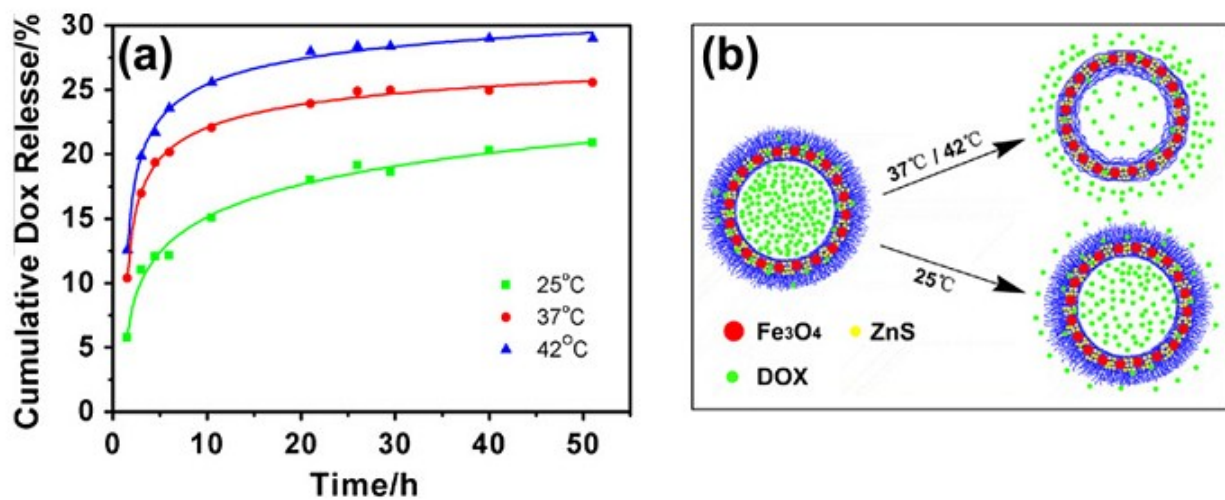

**Figure S21.** (a) The release behaviour of DOX-loaded PNIPAM/Fe<sub>3</sub>O<sub>4</sub>-ZnS hollow spheres in PBS at different temperatures and (b) Schematic diagram for the DOX releasing process <sup>13</sup>

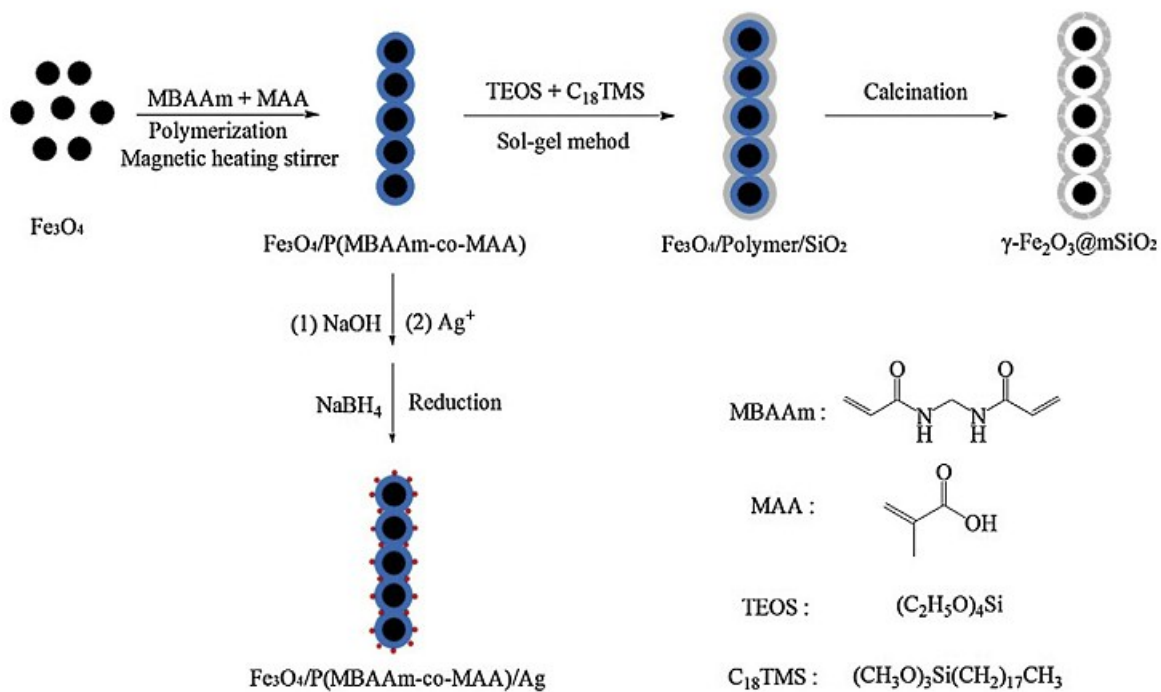

**Figure S22.** The procedure for the synthesis of the 1D magnetic  $\text{Fe}_3\text{O}_4/\text{P}(\text{MBA-co-MAA})/\text{Ag}$  and  $\gamma\text{-Fe}_2\text{O}_3@m\text{SiO}_2$  nanochains

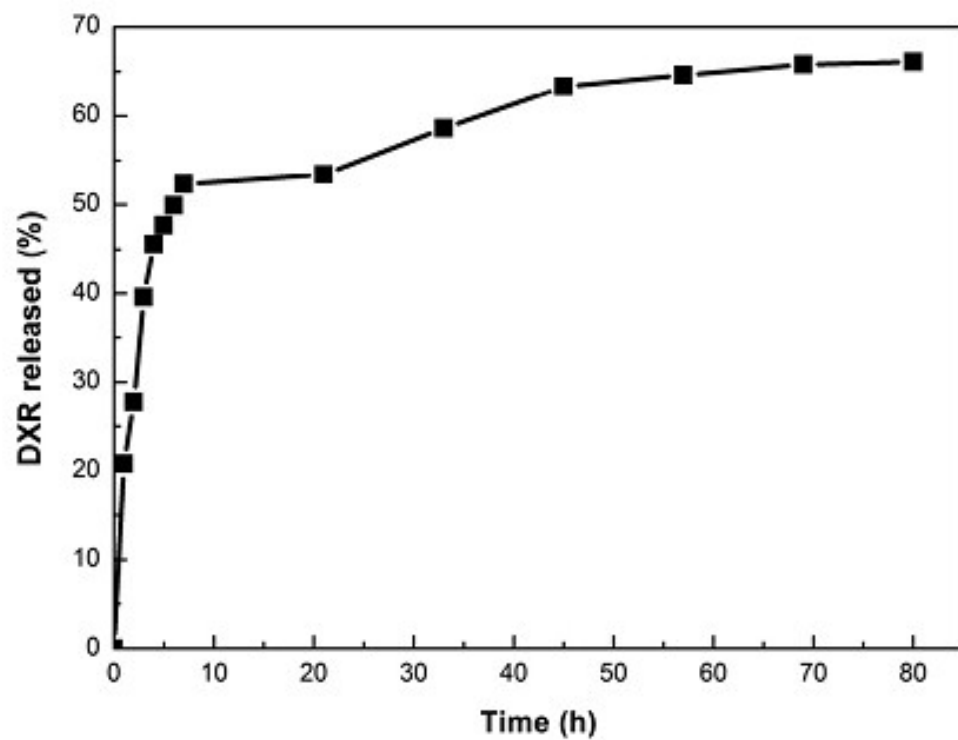

Figure S23. Drug released kinetic curve of  $\gamma\text{-Fe}_2\text{O}_3@m\text{SiO}_2$  nanochains <sup>14</sup>

---



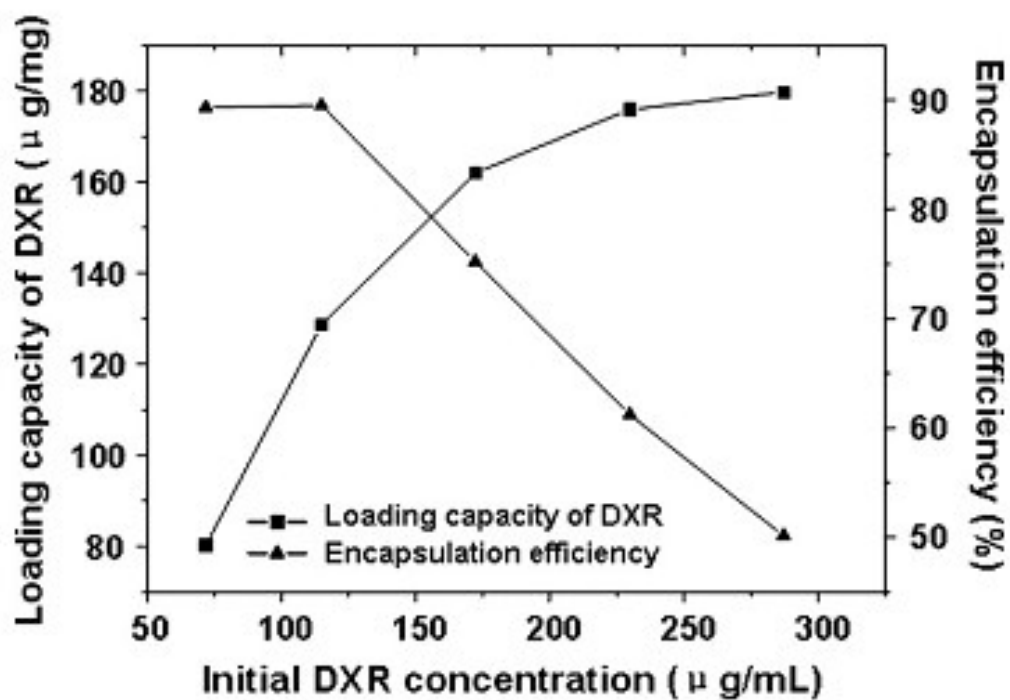

**Figure S24.** The effects of initial DXR concentrations on the drug loading capacity and encapsulation efficiency of magnetite and tumour dual-targeting hollow P(MBAAm-coMAA) microspheres. <sup>15</sup>

---

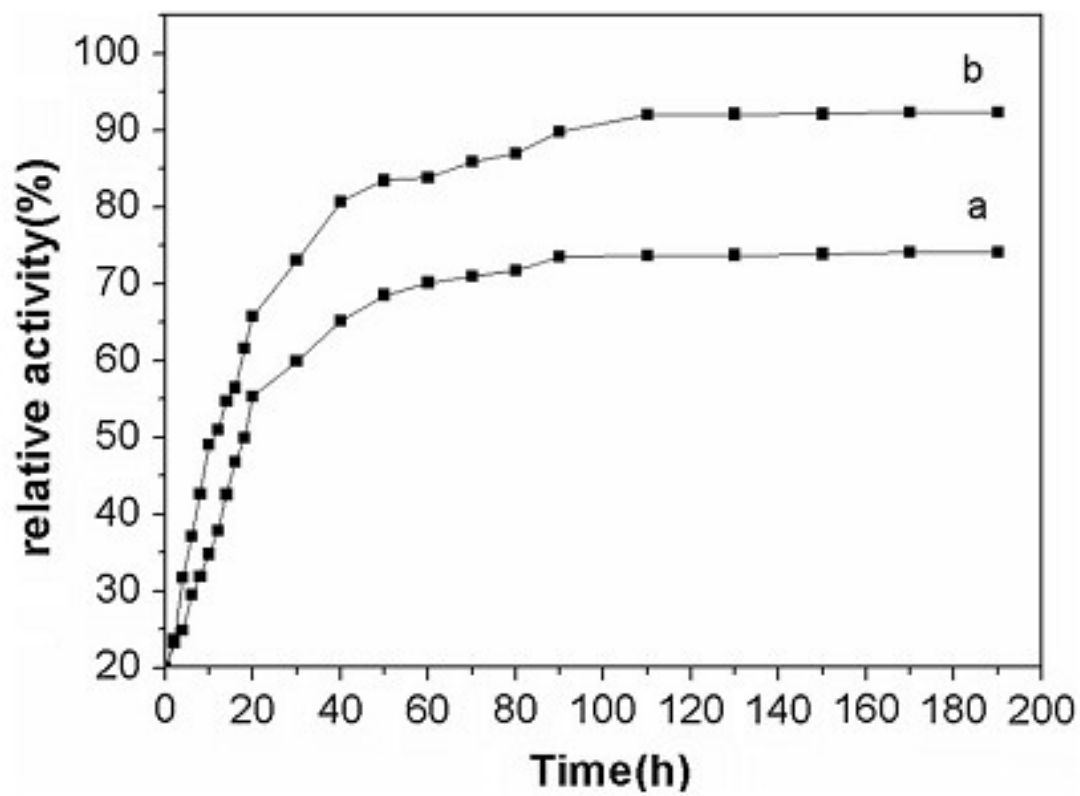

Figure S25. CDDP release from (a) HMS, (b) HMS-CMCS spheres in PBS at 37°C <sup>16</sup>

---

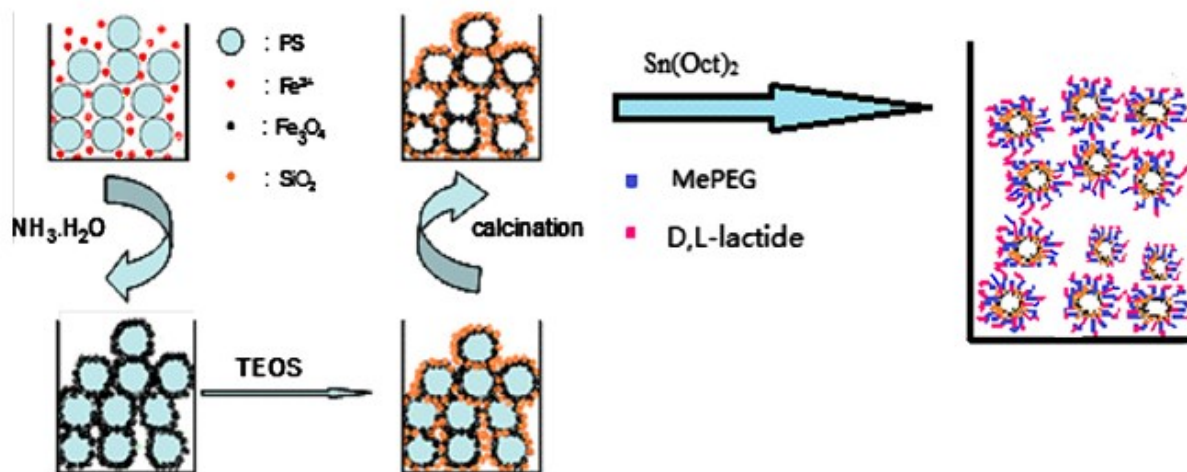

Figure S26. The synthesis procedure of hollow  $\text{Fe}_3\text{O}_4/\text{SiO}_2@$ PEG-PLA <sup>17</sup>

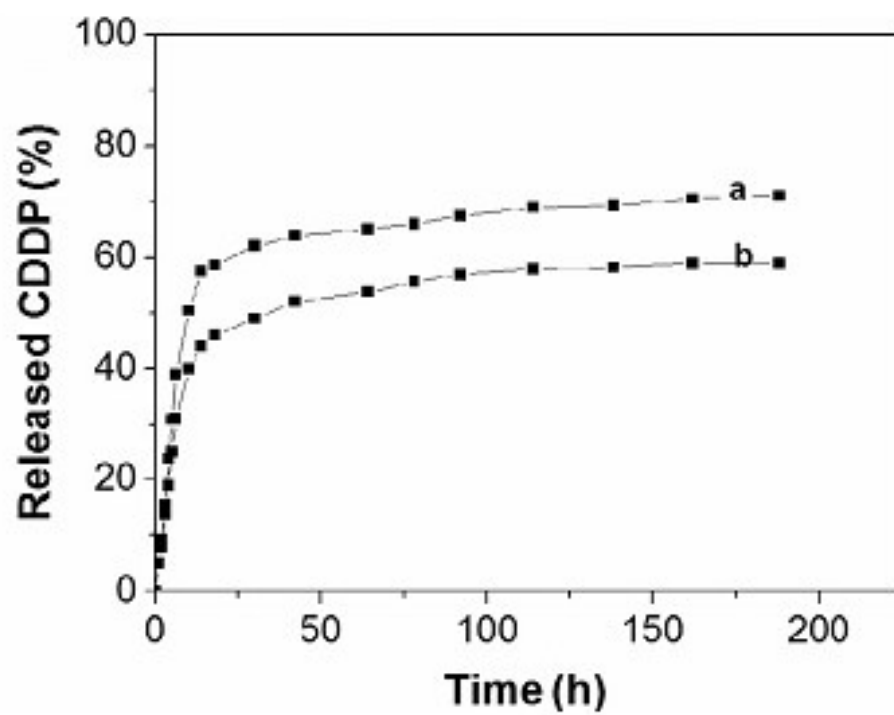

Figure S27. CDDP release from (a) HMS; (b) HMS@PEG-PLA spheres in PBS at 37 °C <sup>17</sup>

---

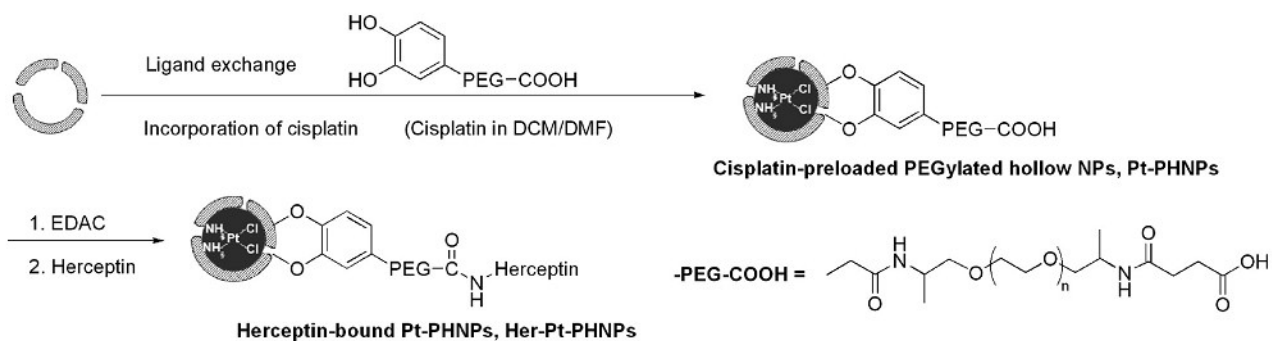

**Figure S28.** Schematic illustration of simultaneous surfactant exchange and cisplatin loading into a PHNP and functionalization of this PHNP with Herceptin. <sup>18</sup>

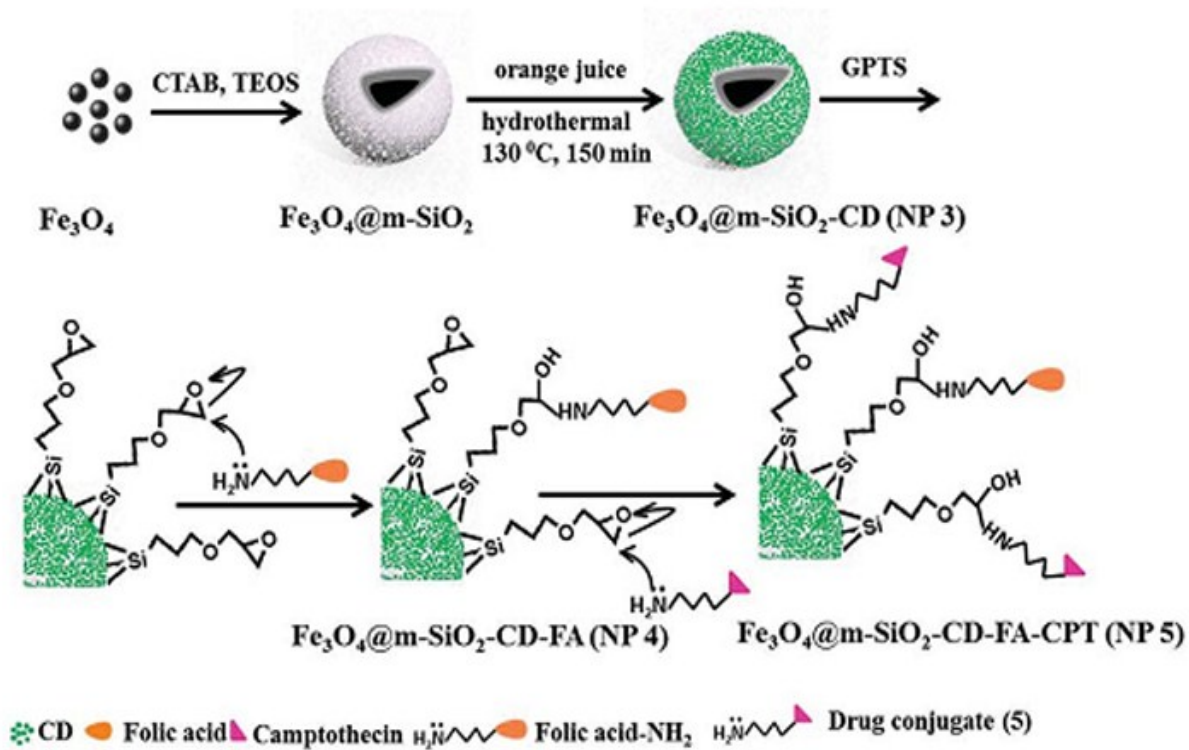

Figure S29. Synthesis of fluorescent magnetic nanoparticles conjugated with CPT and folic acid <sup>19</sup>

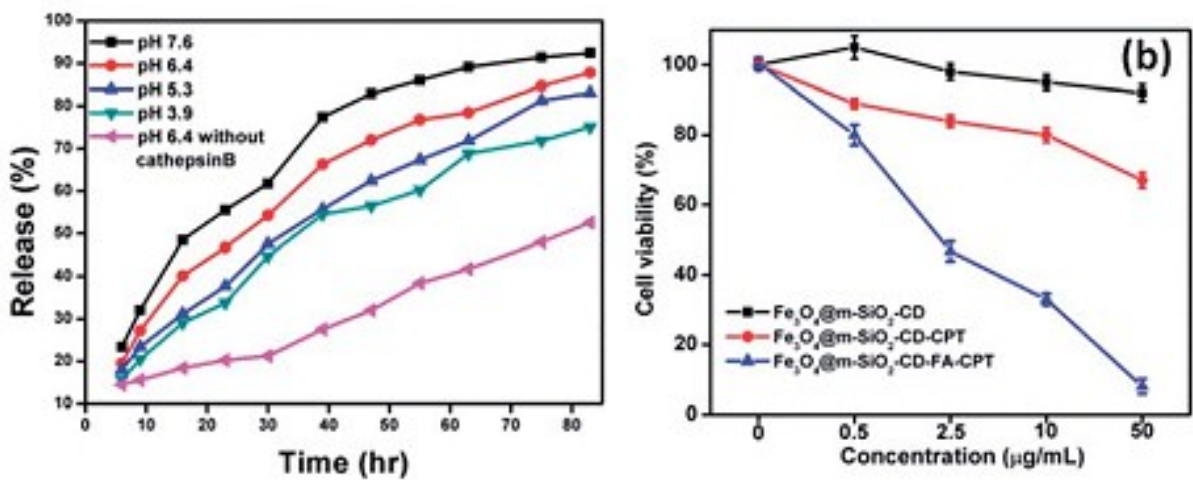

**Figure S30.** (a) Cumulative CPT releases from Fe<sub>3</sub>O<sub>4</sub>@m-SiO<sub>2</sub>-CD-FA-CPT, (b) in vitro cell viability of HeLa with as-prepared Fe<sub>3</sub>O<sub>4</sub>@m-SiO<sub>2</sub>-CD, Fe<sub>3</sub>O<sub>4</sub>@m-SiO<sub>2</sub>-CD-CPT and Fe<sub>3</sub>O<sub>4</sub>@m-SiO<sub>2</sub>-CD-FA-CPT nanoparticles. <sup>19</sup>

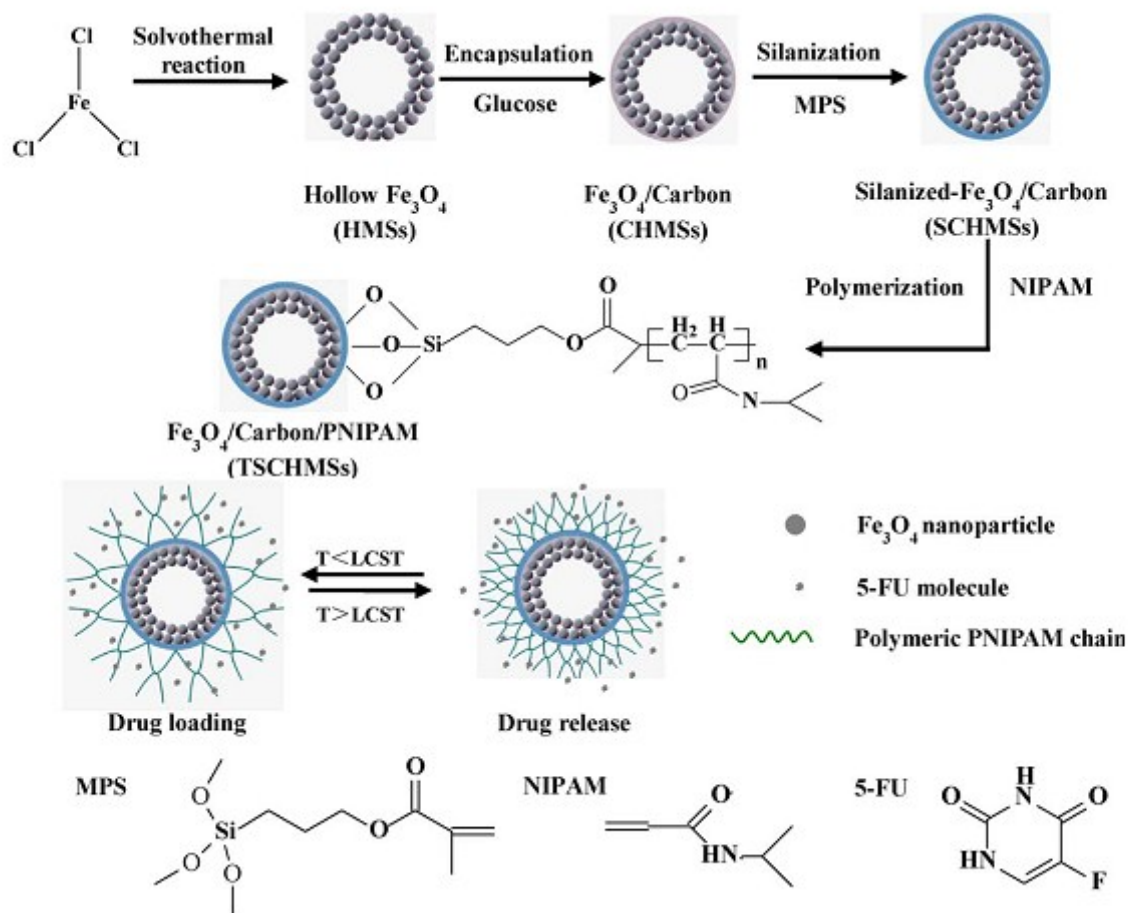

Figure S31. Schematic illustration of the drug loading and release of the hollow dual-responsive microspheres <sup>20</sup>



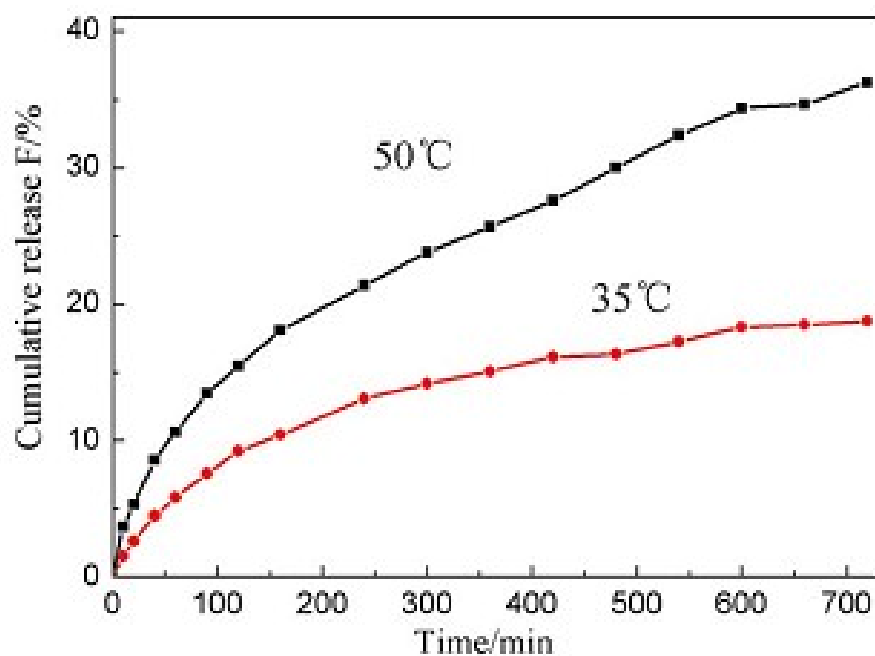

Figure S32. The release profile of the TSCHMSs at 35 and 50°C<sup>20</sup>

## Notes and references

1. S. W. Cao and Y. J. Zhu, *J. Phys. Chem. C*, 2008, **112**, 12149-12156.
2. L. Y. Xia, M. Q. Zhang, C. Yuan and M. Z. Rong, *J. Mater. Chem.*, 2011, **21**, 9020-9026.
3. X. Zhu, S. Zhang, L. Zhang, H. Liu and J. Hu, *RSC Adv.*, 2016, **6**, 58511-58515.
4. J. Zhou, W. Wu, D. Caruntu, M. H. Yu, A. Martin, J. F. Chen, C. J. O'Connor and W. L. Zhou, *J. Phys. Chem. C*, 2007, **111**, 17473-17477.
5. Y. Yang, X. Guo, K. Wei, L. Wang, D. Yang, L. Lai, M. Cheng and Q. Liu, *J. Nanopart. Res.*, 2014, **16**, 2210-2214.
6. D. Yang, K. Wei, Q. Liu, Y. Yang, X. Guo, H. Rong, M. L. Cheng and G. Wang, *Mater. Sci. Eng. C*, 2013, **33**, 2879-2884.
7. L. Li, H. Li, D. Chen, H. Liu, F. Tang, Y. Zhang, J. Ren and Y. Li, *J. Nanosci. Nanotechnol.*, 2009, **9**, 2540-2545.
8. K. Lin, L. Chen, P. Liu, Z. Zou, M. Zhang, Y. Shen, Y. Qiao, X. Liu and J. Chang, *CrystEngComm*, 2013, **15**, 2999-3008.
9. S. Xu, B. Yin, J. Guo and C. Wang, *J. Mater. Chem. B*, 2013, **1**, 4079-4087.
10. S.-J. Park, H.-S. Lim, Y. M. Lee and K. D. Suh, *RSC Adv.*, 2015, **5**, 10081-10088.
11. Y.-K. Peng, Y.-J. Tseng, C.-L. Liu, S.-W. Chou, Y.-W. Chen, S. C. Edman Tsang and P.-T. Chou, *Nanoscale*, 2015, **7**, 2676-2687.
12. Y. Zhu, Y. Fang and S. Kaskel, *J. Phys. Chem. C*, 2010, **114**, 16382-16388.
13. G. Liu, D. Hu, M. Chen, C. Wang and L. Wu, *J. Colloid. Interface Sci.*, 2013, **397**, 73-79.
14. W. Zhang, X. Si, B. Liu, G. Bian, Y. Qi, X. Yang and C. Li, *J. Colloid. Interface Sci.*, 2015, **456**, 145-154.
15. X. Yang, L. Chen, B. Han, X. Yang and H. Duan, *Polymer*, 2010, **51**, 2533-2539.
16. M. Lei, T. Chao and Z. Lei, *J. Nanopart. Res.*, 2014, **16**, 2410-2416.
17. H. Deng and Z. Lei, *Compos. Part B*, 2013, **54**, 194-199.
18. K. Cheng, S. Peng, C. Xu and S. Sun, *J. Am. Chem. Soc.*, 2009, **131**, 10637-10644.
19. S. Sahu, N. Sinha, S. K. Bhutia, M. Majhi and S. Mohapatra, *J. Mater. Chem. B*, 2014, **2**, 3799-3808.

20. L. Chen, H. Zhang, L. Li, Y. Yang, X. Liu and B. Xu, *Appl. Polym. Sci.*, 2015, **132**, 42617-42627.
